# Supplementary material for: Genetic distance in the whole-genome perspective on Listeria monocytogenes strains F2-382 and NIHS-28 that show similar subtyping results
Source: PubMed Central journal article supplement (PMC4269915; doi:10.1186/s12866-014-0309-0), 2014-12-10
Supplement: 12866_2014_309_MOESM1_ESM.pdf [file 12866_2014_309_MOESM1_ESM.pdf]

**Additional file 1** F2-382 CDSs in the gap region

| Contig                | Position       | Locus tag   | Product                                                      | Note                                                                                                                                                                                                                                           |
|-----------------------|----------------|-------------|--------------------------------------------------------------|------------------------------------------------------------------------------------------------------------------------------------------------------------------------------------------------------------------------------------------------|
| Lm_F2-382_contig00002 | 149844..150377 | F2382_00310 | 6-phospho-beta-glucosidase                                   | COG2723; Beta-glucosidase/6-phospho-beta-glucosidase/beta-                                                                                                                                                                                     |
|                       | 150383..150838 | F2382_00311 | hypothetical protein                                         |                                                                                                                                                                                                                                                |
|                       | 151266..152192 | F2382_00312 | N-acetylmuramoyl-L-alanine amidase domain containing protein | Peptidase family U32; cl03113                                                                                                                                                                                                                  |
|                       | 153086..153538 | F2382_00313 | hypothetical protein                                         |                                                                                                                                                                                                                                                |
|                       | 154051..155118 | F2382_00314 | bacteriophage scaffolding GP20 family                        |                                                                                                                                                                                                                                                |
|                       | 156141..157175 | F2382_00315 | tail tape measure protein gp18                               |                                                                                                                                                                                                                                                |
|                       | 158002..160044 | F2382_00316 | putative tape-measure protein                                |                                                                                                                                                                                                                                                |
|                       | 160062..163367 | F2382_00317 | putative tape-measure protein                                |                                                                                                                                                                                                                                                |
|                       | 163378..163983 | F2382_00318 | gp15 protein                                                 | Bacteriophage Gp15 protein;                                                                                                                                                                                                                    |
|                       | 163989..164411 | F2382_00319 | hypothetical protein                                         | Phage protein Gp14; pfam10666                                                                                                                                                                                                                  |
|                       | 164726..165163 | F2382_00320 | putative major tail shaft protein                            |                                                                                                                                                                                                                                                |
|                       | 165166..165573 | F2382_00321 | gp11 protein                                                 |                                                                                                                                                                                                                                                |
|                       | 165911..166273 | F2382_00322 | hypothetical protein                                         | Minor capsid protein; pfam10665                                                                                                                                                                                                                |
|                       | 166273..166677 | F2382_00323 | hypothetical protein                                         |                                                                                                                                                                                                                                                |
|                       | 166828..167727 | F2382_00324 | conserved protein of unknown function                        | Phage capsid family; pfam05065                                                                                                                                                                                                                 |
|                       | 167751..168320 | F2382_00325 | minor structural protein Gp20                                | Phage minor structural protein GP20; pfam06810                                                                                                                                                                                                 |
|                       | 168399..169538 | F2382_00326 | putative 3-mercaptopyruvate                                  |                                                                                                                                                                                                                                                |
|                       | 169544..171043 | F2382_00327 | phage portal protein, putative, A118 family                  |                                                                                                                                                                                                                                                |
|                       | 171047..172423 | F2382_00328 | pbsx family phage terminase large subunit                    |                                                                                                                                                                                                                                                |
|                       | 172929..173228 | F2382_00329 | phage protein                                                |                                                                                                                                                                                                                                                |
|                       | 173519..173953 | F2382_00330 | gp66 protein                                                 |                                                                                                                                                                                                                                                |
|                       | 174265..174648 | F2382_00331 | gp59 protein                                                 |                                                                                                                                                                                                                                                |
|                       | 174652..175119 | F2382_00332 | gp58 protein                                                 | Protein of unknown function (DUF1064); pfam06356                                                                                                                                                                                               |
|                       | 175211..175690 | F2382_00333 | single-stranded DNA-binding protein                          | Helix-destabilizing protein                                                                                                                                                                                                                    |
|                       | 175712..176215 | F2382_00334 | hypothetical protein                                         | Protein of unknown function (DUF812); pfam05667                                                                                                                                                                                                |
|                       | 176885..177172 | F2382_00335 | hypothetical protein                                         |                                                                                                                                                                                                                                                |
|                       | 177404..177769 | F2382_00336 | conserved protein of unknown function                        |                                                                                                                                                                                                                                                |
|                       | 179446..180057 | F2382_00337 | hypothetical protein                                         |                                                                                                                                                                                                                                                |
|                       | 181434..182348 | F2382_00338 | gp49 protein                                                 |                                                                                                                                                                                                                                                |
|                       | 183290..184816 | F2382_00339 | hypothetical protein                                         |                                                                                                                                                                                                                                                |
|                       | 185433..185957 | F2382_00340 | gp43 protein                                                 |                                                                                                                                                                                                                                                |
|                       | 186079..186882 | F2382_00341 | hypothetical protein                                         |                                                                                                                                                                                                                                                |
|                       | 186898..187275 | F2382_00342 | hypothetical protein                                         |                                                                                                                                                                                                                                                |
|                       | 187838..188323 | F2382_00343 | gp33 protein                                                 | Predicted transcriptional regulators[Transcription]; COG1396 Helix-turn-helix XRE-family like proteins.Prokaryotic DNA binding proteins belonging to the xenobiotic response element family of transcriptional regulators; cd00093 salt bridge |
|                       | 188381..188710 | F2382_00344 | hypothetical protein                                         |                                                                                                                                                                                                                                                |
|                       | 189179..189403 | F2382_00345 | gp15 protein                                                 |                                                                                                                                                                                                                                                |
|                       | 189418..190104 | F2382_00346 | putative lipoprotein gp32                                    |                                                                                                                                                                                                                                                |
|                       | 190147..191373 | F2382_00347 | putative integrase/recombinase                               | Int/Topo IB signature motif                                                                                                                                                                                                                    |
