# Supplementary material for: Genetic distance in the whole-genome perspective on Listeria monocytogenes strains F2-382 and NIHS-28 that show similar subtyping results
Source: PubMed Central journal article supplement (PMC4269915; doi:10.1186/s12866-014-0309-0), 2014-12-10
Supplement: 12866_2014_309_MOESM2_ESM.pdf [file 12866_2014_309_MOESM2_ESM.pdf]

**Additional file 2** NIHS-28 CDSs in the gap region

| Contig                 | position     | Locus tag      | Product                                                      | Note                                                                                                                                                                                                                         |
|------------------------|--------------|----------------|--------------------------------------------------------------|------------------------------------------------------------------------------------------------------------------------------------------------------------------------------------------------------------------------------|
| Lm_NIHS-28_contig00024 | 48..1481     | LmNIHS28_02108 | putative integrase                                           |                                                                                                                                                                                                                              |
|                        | 2689..3174   | LmNIHS28_02109 | gp33 protein                                                 |                                                                                                                                                                                                                              |
|                        | 3922..4695   | LmNIHS28_02110 | phage protein                                                | Phage antirepressor protein KilAC domain;pfam03374                                                                                                                                                                           |
|                        | 4817..5350   | LmNIHS28_02111 | gp43 protein                                                 |                                                                                                                                                                                                                              |
|                        | 6077..7603   | LmNIHS28_02112 | hypothetical protein                                         |                                                                                                                                                                                                                              |
|                        | 8545..9459   | LmNIHS28_02113 | gp49 protein                                                 |                                                                                                                                                                                                                              |
|                        | 10013..10825 | LmNIHS28_02114 | DNA adenine                                                  |                                                                                                                                                                                                                              |
|                        | 11379..11939 | LmNIHS28_02115 | hypothetical protein                                         |                                                                                                                                                                                                                              |
|                        | 12103..12561 | LmNIHS28_02116 | hypothetical protein                                         |                                                                                                                                                                                                                              |
|                        | 13117..13515 | LmNIHS28_02117 | gp59 protein                                                 |                                                                                                                                                                                                                              |
|                        | 13694..14176 | LmNIHS28_02118 | single-stranded DNA-binding protein                          | Single-stranded DNA-binding protein [DNA replication, recombination, and repair]; COG0629<br>Helix-destabilizing protein dimer interface [polypeptide binding]<br>tetramer (dimer of dimers) interface [polypeptide binding] |
|                        | 14616..15020 | LmNIHS28_02119 | integrase                                                    |                                                                                                                                                                                                                              |
|                        | 15390..15980 | LmNIHS28_02120 | putative Positive control factor                             | positive control sigma-like factor; Validated DNA binding residues [nucleotide binding]                                                                                                                                      |
|                        | 16191..16469 | LmNIHS28_02121 | conserved protein of unknown function                        |                                                                                                                                                                                                                              |
|                        | 17212..18552 | LmNIHS28_02122 | phage terminase, large subunit, PBSX family                  | Phage terminase large subunit; cl12054<br>Terminase-like family; pfam03237                                                                                                                                                   |
|                        | 18567..20123 | LmNIHS28_02123 | hypothetical protein                                         |                                                                                                                                                                                                                              |
|                        | 20128..21171 | LmNIHS28_02124 | gp4 protein                                                  | Phage Mu protein F like protein; cl10072                                                                                                                                                                                     |
|                        | 21267..21821 | LmNIHS28_02125 | phage protein                                                |                                                                                                                                                                                                                              |
|                        | 21844..22716 | LmNIHS28_02126 | putative phage major capsid protein                          |                                                                                                                                                                                                                              |
|                        | 23221..23616 | LmNIHS28_02127 | hypothetical protein                                         |                                                                                                                                                                                                                              |
|                        | 24275..24982 | LmNIHS28_02128 | Ig-like virion protein                                       |                                                                                                                                                                                                                              |
|                        | 25032..25463 | LmNIHS28_02129 | hypothetical protein                                         |                                                                                                                                                                                                                              |
|                        | 25776..30575 | LmNIHS28_02130 | phage tail tape measure protein                              |                                                                                                                                                                                                                              |
|                        | 30579..31403 | LmNIHS28_02131 | hypothetical protein                                         |                                                                                                                                                                                                                              |
|                        | 33451..34524 | LmNIHS28_02132 | gp20 protein                                                 |                                                                                                                                                                                                                              |
|                        | 35037..35411 | LmNIHS28_02133 | gp23 protein                                                 |                                                                                                                                                                                                                              |
|                        | 35450..35725 | LmNIHS28_02134 | holin                                                        |                                                                                                                                                                                                                              |
|                        | 35941..36867 | LmNIHS28_02135 | N-acetylmuramoyl-L-alanine amidase domain containing protein |                                                                                                                                                                                                                              |
|                        | 37219..37773 | LmNIHS28_02136 | aspartate-semialdehyde dehydrogenase                         | COG0136 Aspartate-semialdehyde dehydrogenase<br>aspartate-semialdehyde dehydrogenase; Provisional<br>Semialdehyde dehydrogenase, dimerization                                                                                |
